# Supplementary material
Source: HighWire-hosted journal article supplement (https://www.annfammed.org/highwire/filestream/8353/field_highwire_adjunct_files/2/Johnson_Supp_App_C.pdf)
Supplement: Johnson_Supp_App_C.pdf [file Johnson_Supp_App_C.pdf]

Online Supplementary Material

Lau D, Hu J, Majumdar SR, Storie DA, Rees SE, Johnson JA. Interventions to improve influenza and pneumococcal vaccination rates among community-dwelling adults: A systematic review and meta-analysis. *Ann Fam Med*. 2012;10(6):538-546.

<http://www.annfammed.org/content/10/6/538/suppl/DC1>

**Supplemental Appendix C.** These exhibits contain additional figures and tables from the data synthesis. Forest plots depicting the results of meta-analyses stratified by sub-categories of patient outreach and team change interventions are provided, as well as tables with numbers-needed-to-treat for a variety of baseline vaccination rates.

This supplement contains additional figures and tables from data synthesis. Exhibits C.1 and C.3 depict the results of meta-analyses for particular patient outreach strategies for influenza and pneumococcal vaccinations, respectively. Exhibits C.2 and C.4 depict the results of meta-analyses stratified by various team change approaches, for influenza and pneumococcal vaccinations, respectively. Finally, exhibits C.5 (a) and (b) list estimated numbers needed to treat for an additional vaccination, based on pooled intervention odds ratios.

Exhibit C.1(a). Effect of patient outreach methods on influenza vaccination rates

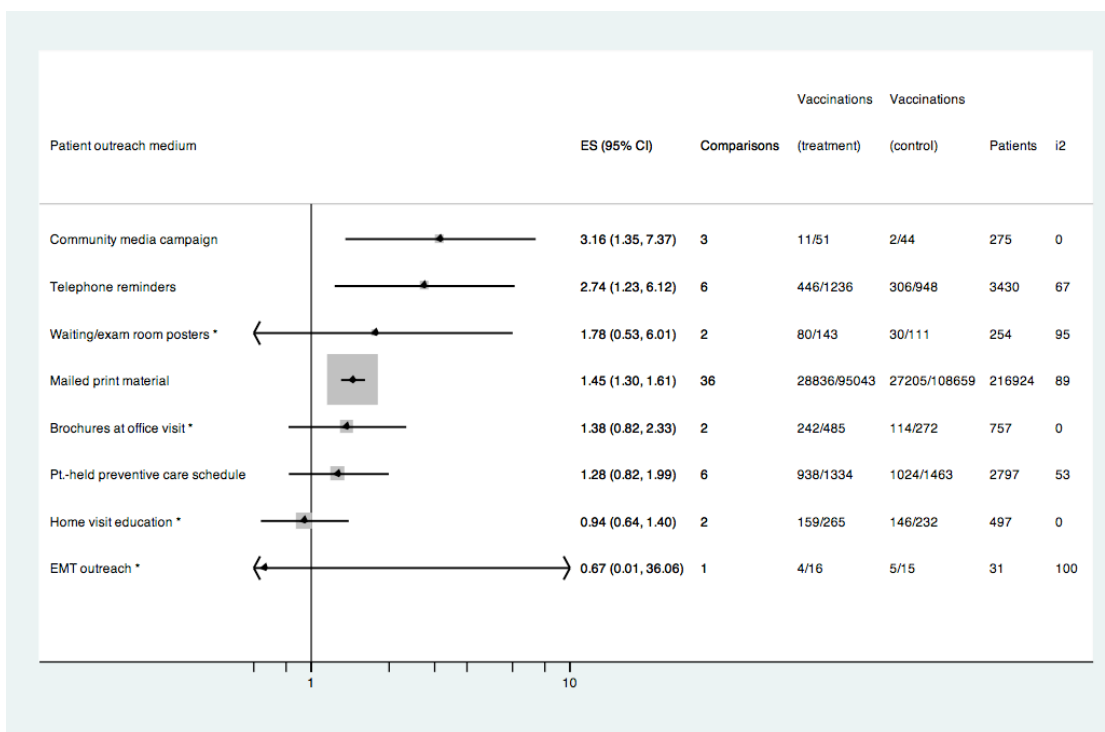

- Pooled odds ratios from fewer than 3 comparisons.

Exhibit C.1(b). Forest plots for patient outreach methods – influenza vaccination rates

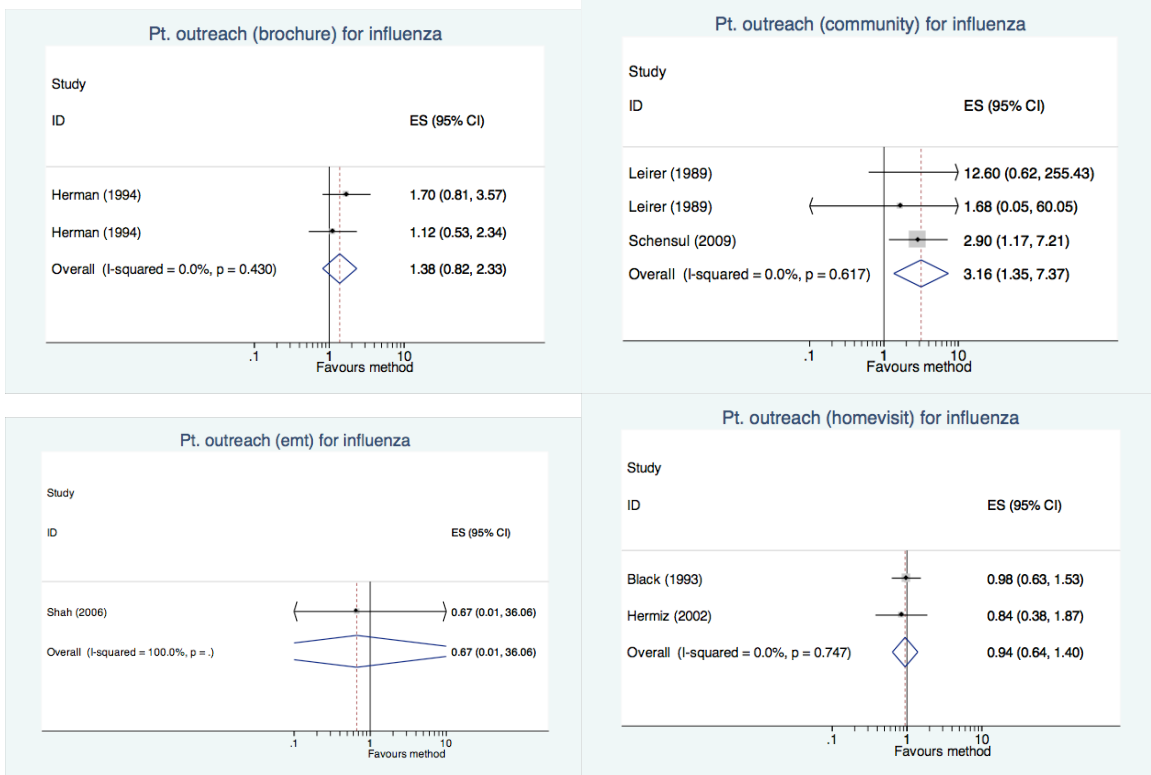

Exhibit C.1(b). Forest plots for patient outreach methods – influenza vaccination rates (continued)

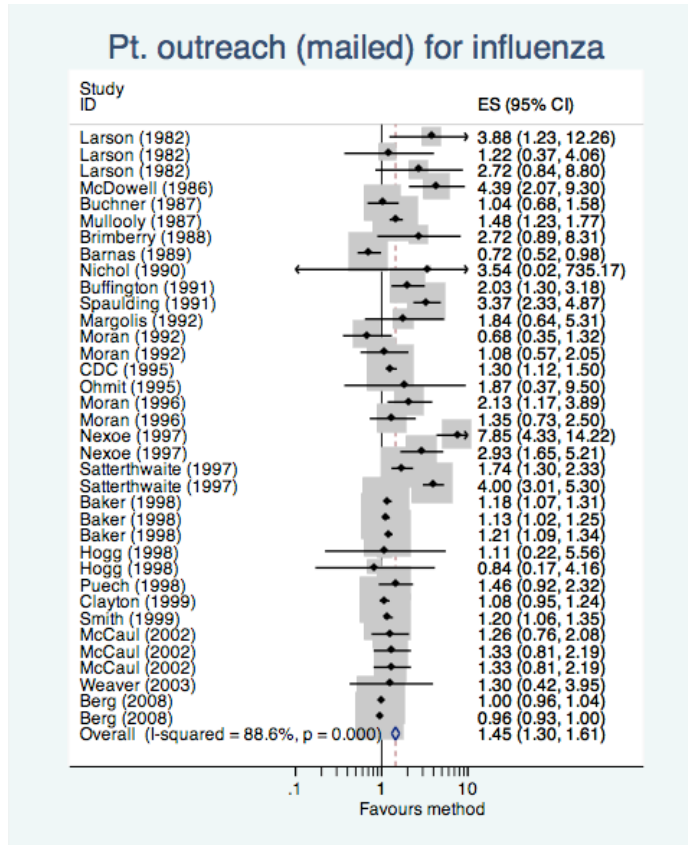

Exhibit C.1(b). Forest plots for patient outreach methods – influenza vaccination rates  
(continued)

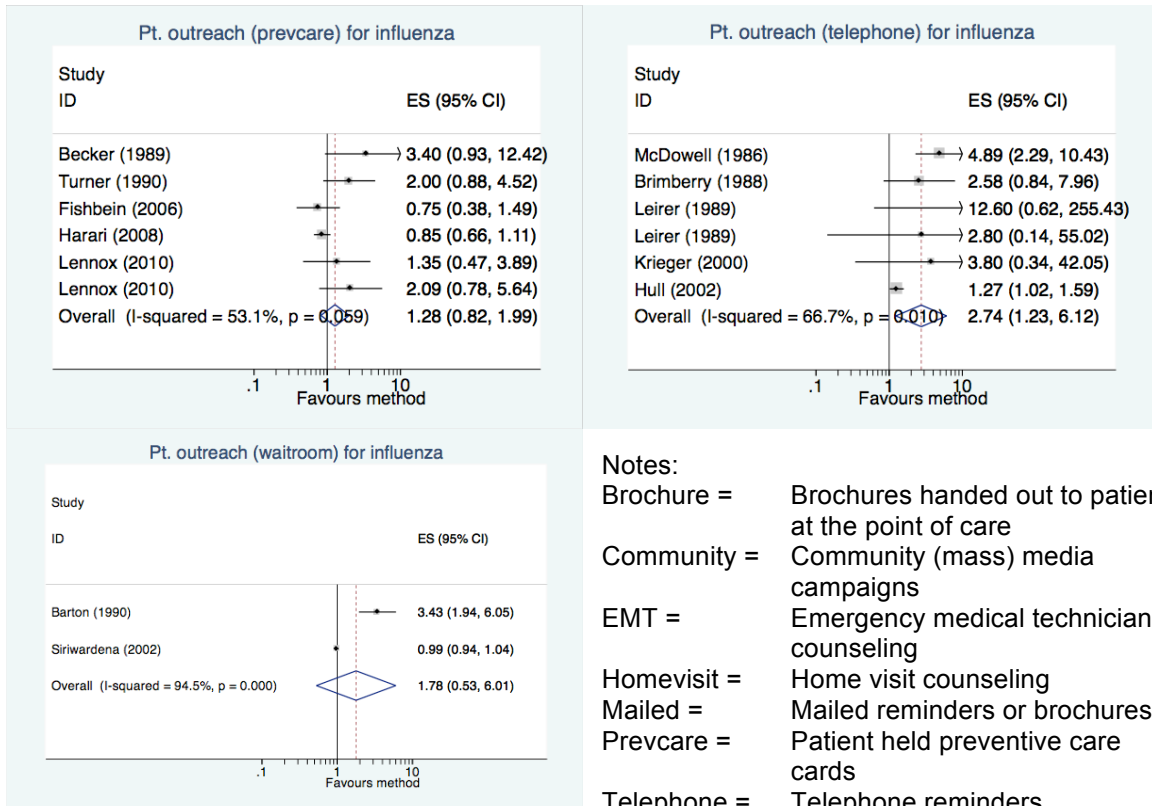

- Notes:
- Brochure = Brochures handed out to patients at the point of care
  - Community = Community (mass) media campaigns
  - EMT = Emergency medical technician counseling
  - Homevisit = Home visit counseling
  - Mailed = Mailed reminders or brochures
  - Prevcare = Patient held preventive care cards
  - Telephone = Telephone reminders
  - Waitroom = Waiting room materials

Exhibit C.2(a). Effect of team change on influenza vaccination rates

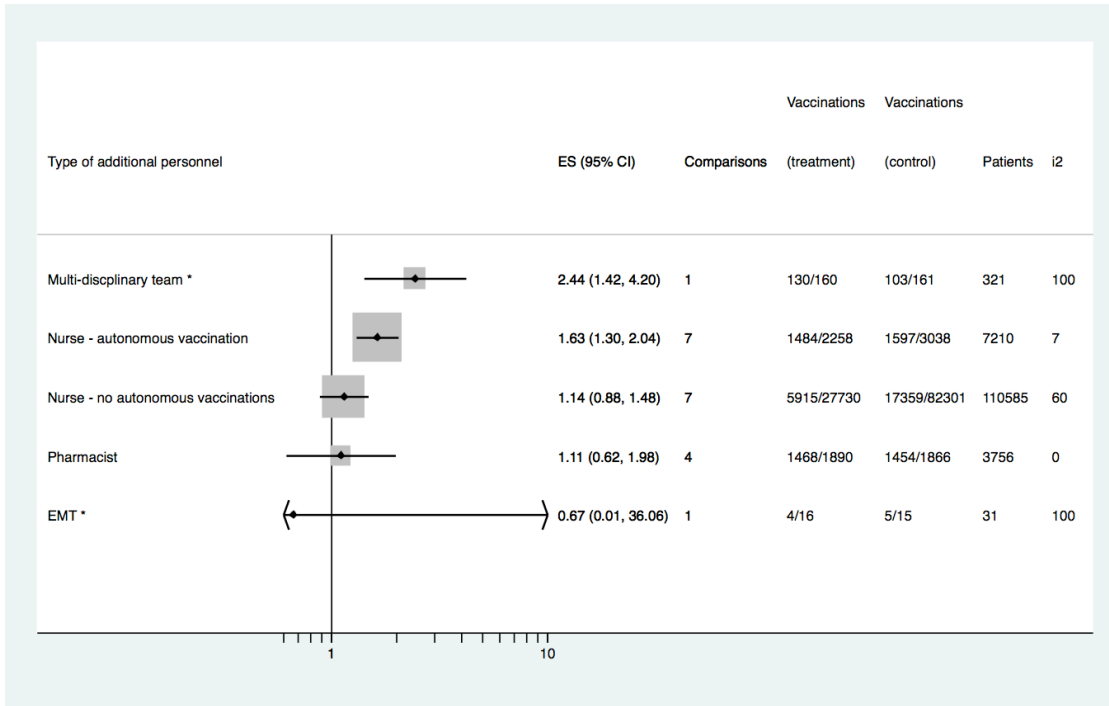

\* Pooled odds ratios from fewer than 3 comparisons.

Exhibit C.2(b). Forest plots of team change characteristics on influenza vaccination rates

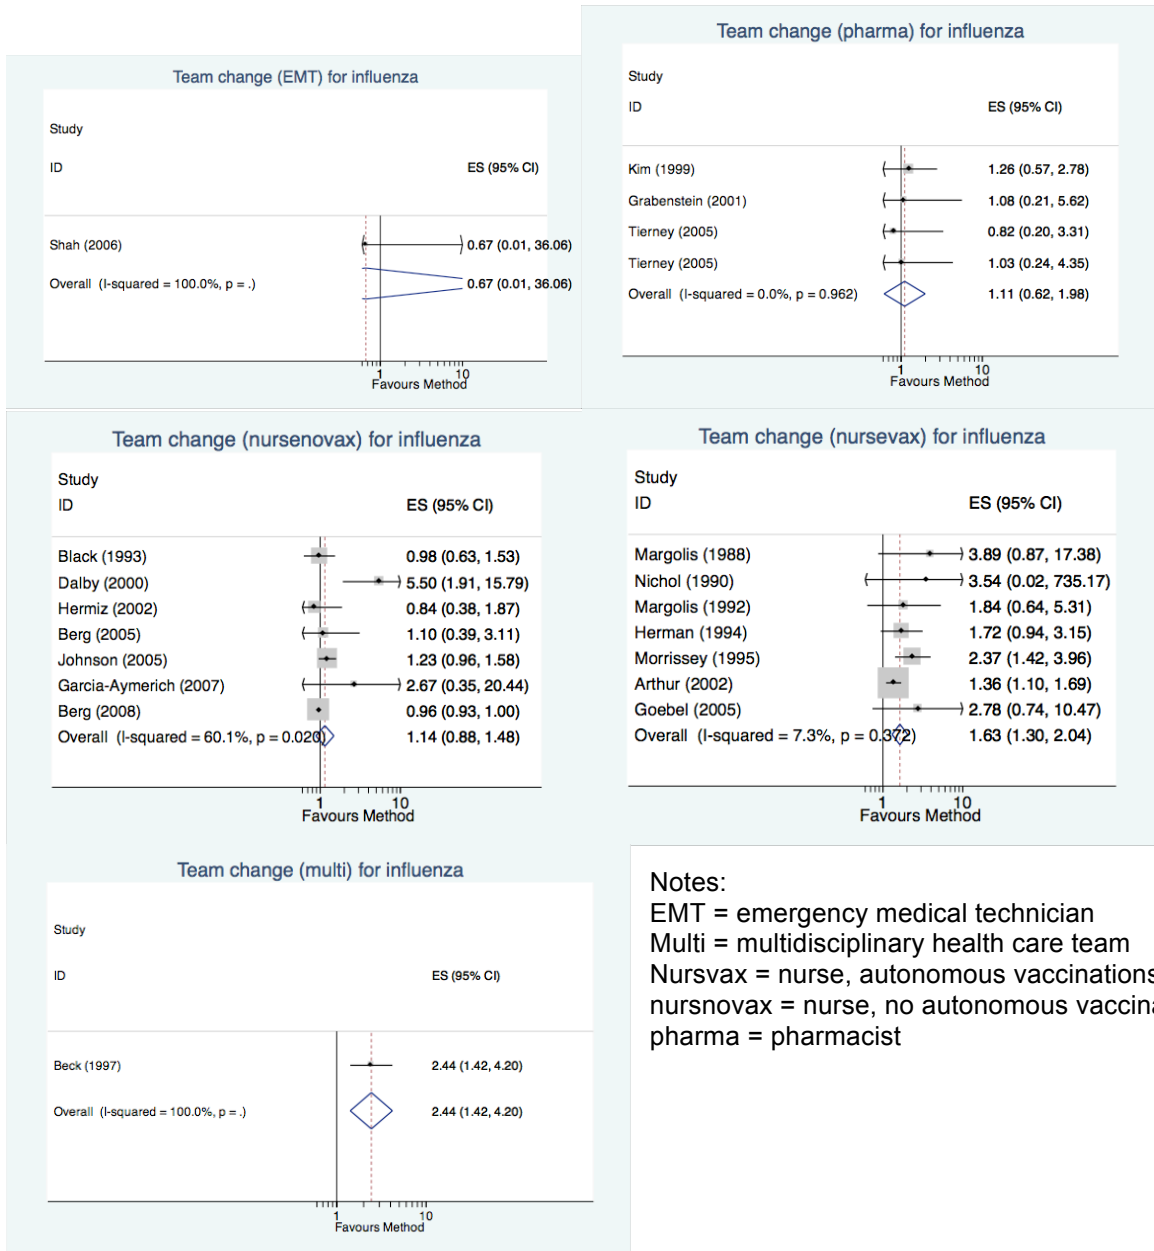

Exhibit C.3(a). Effect of patient outreach methods on pneumococcal vaccination rates

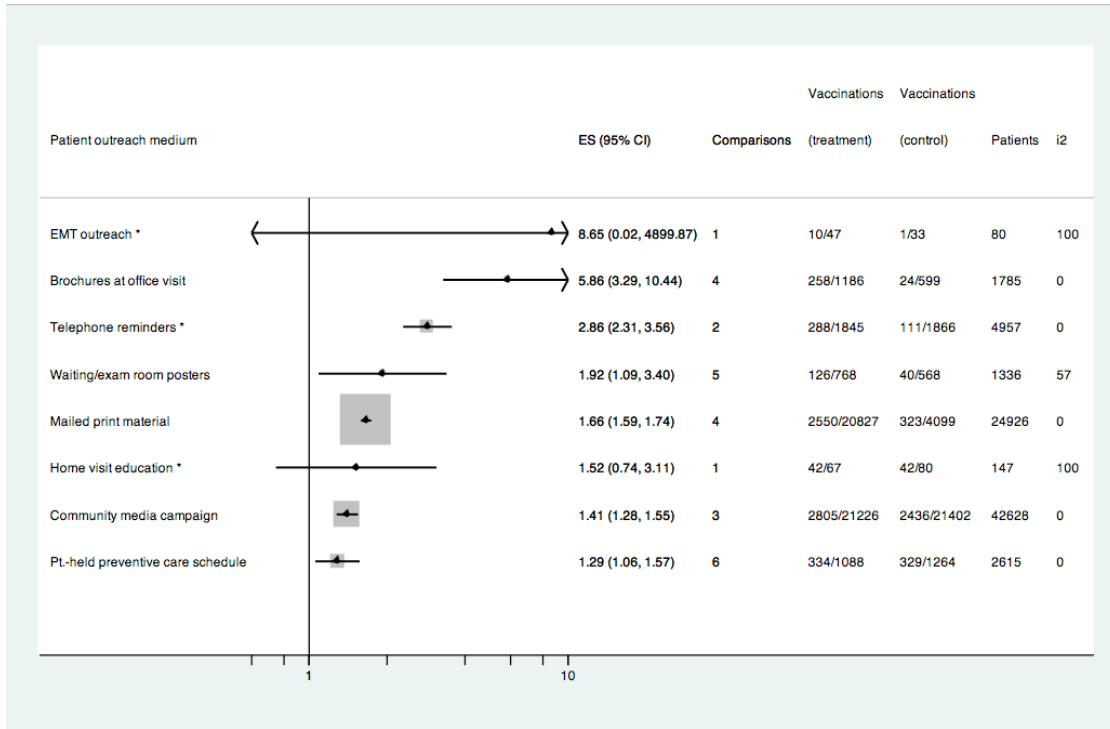

\* Pooled odds ratios from fewer than 3 comparisons.

\*\* The pooled odds ratio for waiting/exam room posters is likely over-estimated, since there were few comparisons and the highest performing comparisons combined posters with other effective interventions. Indeed, analysis of comparisons featuring waiting and exam room posters alone (n = 2) showed a pooled OR = 1.17 (95% CI [0.726, 3.566], I<sup>2</sup> = 0%).

Exhibit C.3(b). Forest plots for patient outreach methods – pneumococcal vaccination rates

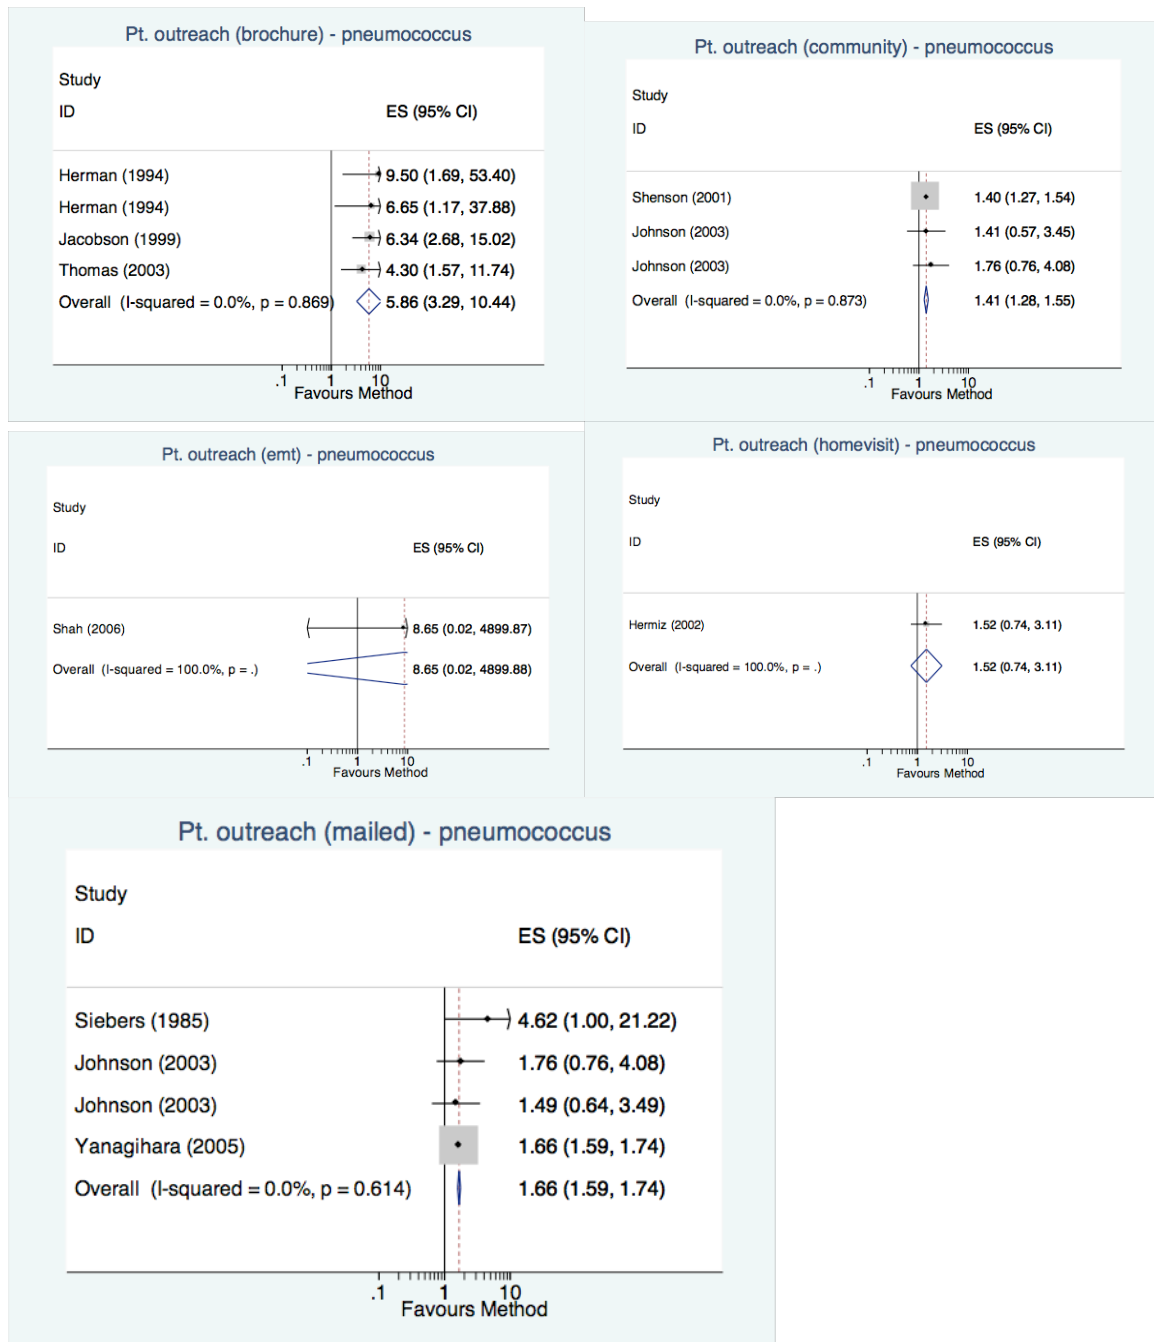



Exhibit C.3(b). Forest plots for patient outreach methods on pneumococcal vaccination rates (Continued)

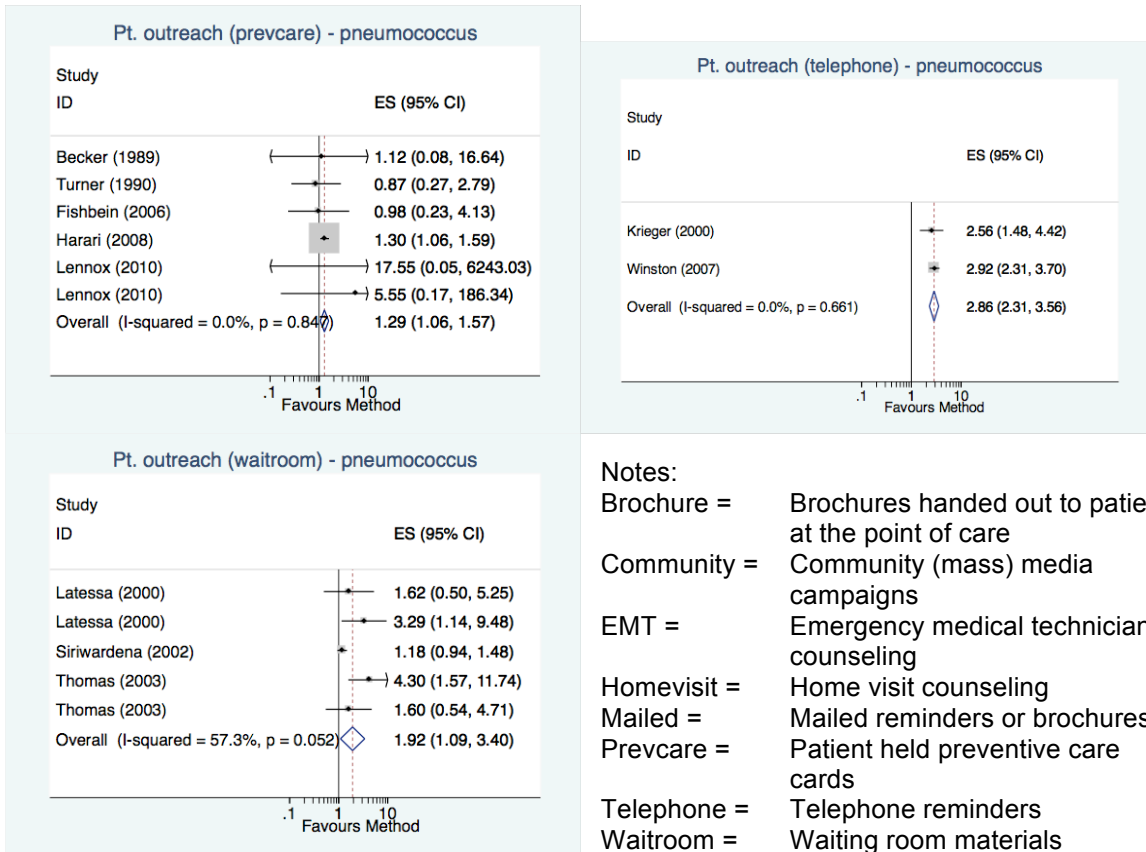

Exhibit C.4(a). Team change effects on pneumococcal vaccination rates

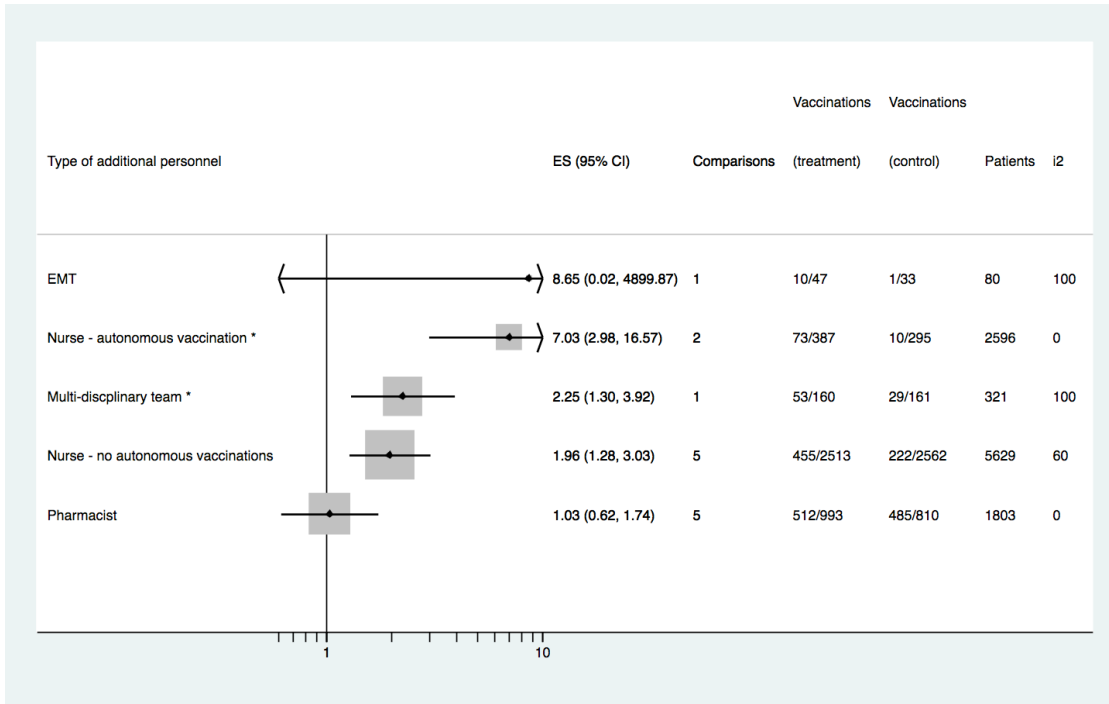

\* Pooled odds ratios from fewer than 3 comparisons.

Exhibit C.4(b). Forest plots of team change characteristics – pneumococcal vaccination rates

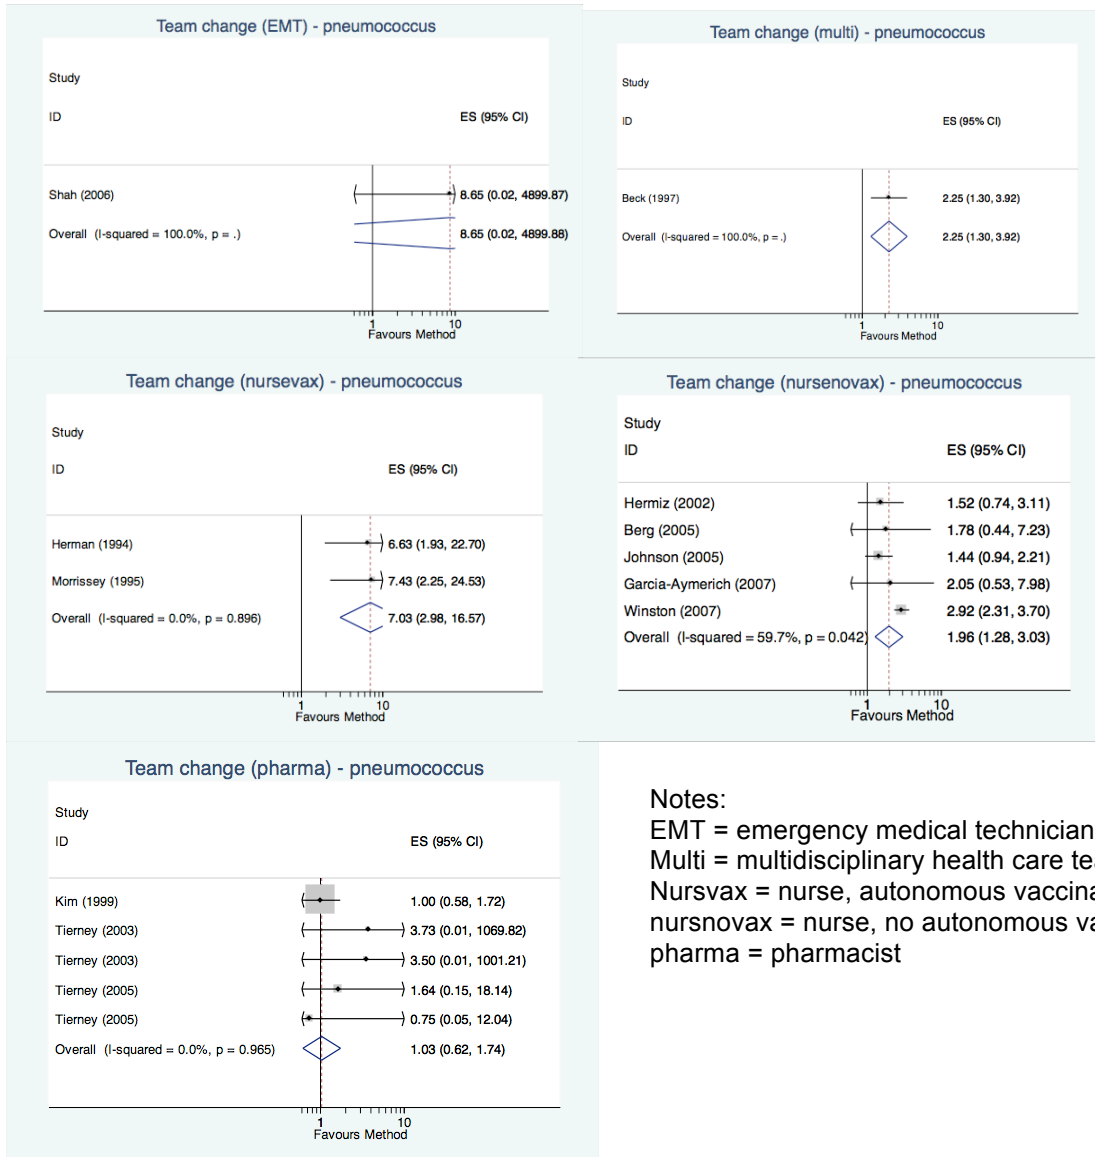

**Notes:**  
 EMT = emergency medical technician  
 Multi = multidisciplinary health care team  
 Nursvax = nurse, autonomous vaccinations  
 nursnovax = nurse, no autonomous vaccinations  
 pharma = pharmacist

Exhibit C.5(a). Numbers needed to treat for an additional influenza vaccination

| Baseline vaccination rate | QI intervention                            | NNT  |
|---------------------------|--------------------------------------------|------|
| 0.3                       | Patient outreach - community media         | 3.6  |
| 0.3                       | Patient outreach - telephone reminders     | 4.2  |
| 0.3                       | Financial incentives (patient)             | 6.3  |
| 0.3                       | Audit and feedback                         | 7.2  |
| 0.3                       | Team change - nurse vaccine administration | 9.0  |
| 0.3                       | Clinician reminders                        | 10.4 |
| 0.3                       | Financial incentives (clinician)           | 10.6 |
| 0.3                       | Patient outreach - mailed print materials  | 12.0 |
| 0.3                       | Team change                                | 12.3 |
| 0.3                       | Patient outreach                           | 12.8 |
| 0.3                       | Delivery site change                       | 16.3 |
|                           |                                            |      |
| 0.4                       | Patient outreach - community media         | 3.6  |
| 0.4                       | Patient outreach - telephone reminders     | 4.1  |
| 0.4                       | Financial incentives (patient)             | 5.9  |
| 0.4                       | Audit and feedback                         | 6.7  |
| 0.4                       | Team change - nurse vaccine administration | 8.3  |
| 0.4                       | Clinician reminders                        | 9.5  |
| 0.4                       | Financial incentives (clinician)           | 9.7  |
| 0.4                       | Patient outreach - mailed print materials  | 10.9 |
| 0.4                       | Team change                                | 11.1 |
| 0.4                       | Patient outreach                           | 11.6 |
| 0.4                       | Delivery site change                       | 14.7 |
|                           |                                            |      |
| 0.5                       | Patient outreach - community media         | 3.9  |
| 0.5                       | Patient outreach - telephone reminders     | 4.3  |
| 0.5                       | Financial incentives (patient)             | 6.1  |
| 0.5                       | Audit and feedback                         | 6.8  |
| 0.5                       | Team change - nurse vaccine administration | 8.3  |
| 0.5                       | Clinician reminders                        | 9.5  |
| 0.5                       | Financial incentives (clinician)           | 9.7  |
| 0.5                       | Patient outreach - mailed print materials  | 10.9 |
| 0.5                       | Team change                                | 11.1 |
| 0.5                       | Patient outreach                           | 11.5 |
| 0.5                       | Delivery site change                       | 14.5 |
|                           |                                            |      |
| 0.6                       | Patient outreach - community media         | 4.4  |
| 0.6                       | Patient outreach - telephone reminders     | 4.9  |
| 0.6                       | Financial incentives (patient)             | 6.8  |
| 0.6                       | Audit and feedback                         | 7.5  |
| 0.6                       | Team change - nurse vaccine administration | 9.1  |
| 0.6                       | Clinician reminders                        | 10.4 |
| 0.6                       | Financial incentives (clinician)           | 10.5 |

**Online Supplementary Data**

<http://www.annfammed.org/content/10/6/538/DC1>

|     |                                            |      |
|-----|--------------------------------------------|------|
| 0.6 | Patient outreach - mailed print materials  | 11.8 |
| 0.6 | Team change                                | 12.0 |
| 0.6 | Patient outreach                           | 12.4 |
| 0.6 | Delivery site change                       | 15.5 |
|     |                                            |      |
| 0.7 | Patient outreach - community media         | 5.5  |
| 0.7 | Patient outreach - telephone reminders     | 6.1  |
| 0.7 | Financial incentives (patient)             | 8.2  |
| 0.7 | Audit and feedback                         | 9.1  |
| 0.7 | Team change - nurse vaccine administration | 10.9 |
| 0.7 | Clinician reminders                        | 12.3 |
| 0.7 | Financial incentives (clinician)           | 12.5 |
| 0.7 | Patient outreach - mailed print materials  | 13.9 |
| 0.7 | Team change                                | 14.2 |
| 0.7 | Patient outreach                           | 14.7 |
| 0.7 | Delivery site change                       | 18.2 |

Online Supplementary Data

<http://www.annfammed.org/content/10/6/538/DC1>

Exhibit C.5(b). Numbers needed to treat for an additional pneumococcal vaccination

| Baseline vaccination rate | QI intervention                                             | NNT  |
|---------------------------|-------------------------------------------------------------|------|
| 0.3                       | Patient outreach - brochures handed out before appointments | 2.4  |
| 0.3                       | Clinician reminders                                         | 5.2  |
| 0.3                       | Team change                                                 | 5.8  |
| 0.3                       | Team change involving nurses without vaccination powers     | 6.4  |
| 0.3                       | Patient outreach - waiting / exam room posters              | 6.6  |
| 0.3                       | Patient outreach                                            | 7.4  |
| 0.3                       | Patient outreach - mailed print materials                   | 8.6  |
| 0.3                       | Clinician education                                         | 10.2 |
| 0.3                       | Case management                                             | 11.1 |
| 0.3                       | Patient outreach - community media                          | 13.0 |
| 0.3                       | Preventive care checklists                                  | 17.8 |
|                           |                                                             |      |
| 0.4                       | Patient outreach - brochures handed out before appointments | 2.5  |
| 0.4                       | Clinician reminders                                         | 4.9  |
| 0.4                       | Team change                                                 | 5.5  |
| 0.4                       | Team change involving nurses without vaccination powers     | 6.0  |
| 0.4                       | Patient outreach - waiting / exam room posters              | 6.2  |
| 0.4                       | Patient outreach                                            | 6.9  |
| 0.4                       | Patient outreach - mailed print materials                   | 8.0  |
| 0.4                       | Clinician education                                         | 9.4  |
| 0.4                       | Case management                                             | 10.2 |
| 0.4                       | Patient outreach - community media                          | 11.8 |
| 0.4                       | Preventive care checklists                                  | 16.0 |
|                           |                                                             |      |
| 0.5                       | Patient outreach - brochures handed out before appointments | 2.8  |
| 0.5                       | Clinician reminders                                         | 5.1  |
| 0.5                       | Team change                                                 | 5.7  |
| 0.5                       | Team change involving nurses without vaccination powers     | 6.2  |
| 0.5                       | Patient outreach - waiting / exam room posters              | 6.3  |
| 0.5                       | Patient outreach                                            | 7.0  |
| 0.5                       | Patient outreach - mailed print materials                   | 8.1  |
| 0.5                       | Clinician education                                         | 9.4  |
| 0.5                       | Case management                                             | 10.2 |
| 0.5                       | Patient outreach - community media                          | 11.8 |
| 0.5                       | Preventive care checklists                                  | 15.8 |
|                           |                                                             |      |
| 0.6                       | Patient outreach - brochures handed out before appointments | 3.4  |
| 0.6                       | Clinician reminders                                         | 5.8  |
| 0.6                       | Team change                                                 | 6.3  |
| 0.6                       | Team change involving nurses without vaccination powers     | 6.8  |
| 0.6                       | Patient outreach - waiting / exam room posters              | 7.0  |
| 0.6                       | Patient outreach                                            | 7.7  |
| 0.6                       | Patient outreach - mailed print materials                   | 8.8  |

**Online Supplementary Data**

<http://www.annfammed.org/content/10/6/538/DC1>

|     |                                                             |      |
|-----|-------------------------------------------------------------|------|
| 0.6 | Clinician education                                         | 10.2 |
| 0.6 | Case management                                             | 11.0 |
| 0.6 | Patient outreach - community media                          | 12.7 |
| 0.6 | Preventive care checklists                                  | 16.9 |
|     |                                                             |      |
| 0.7 | Patient outreach - brochures handed out before appointments | 4.3  |
| 0.7 | Clinician reminders                                         | 7.1  |
| 0.7 | Team change                                                 | 7.7  |
| 0.7 | Team change involving nurses without vaccination powers     | 8.3  |
| 0.7 | Patient outreach - waiting / exam room posters              | 8.5  |
| 0.7 | Patient outreach                                            | 9.3  |
| 0.7 | Patient outreach - mailed print materials                   | 10.5 |
| 0.7 | Clinician education                                         | 12.2 |
| 0.7 | Case management                                             | 13.1 |
| 0.7 | Patient outreach - community media                          | 14.9 |
| 0.7 | Preventive care checklists                                  | 19.8 |
